# Supplementary material for: Two novel metal–organic frameworks functionalised with pentamethylcyclopentadienyl iridium(iii) chloride for catalytic conversion of carbon dioxide to formate
Source: Royal Society of Chemistry journal article supplement (doi:10.1039/d3dt00635b), 2023-01-01
Supplement: d3dt00635b1.pdf [file d3dt00635b1.pdf]

## Two Novel Metal-Organic Frameworks functionalised with pentamethylcyclopentadienyl iridium(III) chloride for catalytic conversion of carbon dioxide to formate

Maureen Gumbo,<sup>1,2</sup> Banothile E. C. Makhubela,<sup>\*2</sup> and Gift Mehlana<sup>\*1</sup>

<sup>1</sup>Department of Chemical Sciences, Faculty of Science and Technology, Midlands State University, Private Bag 9055, Senga Road, Gweru, Zimbabwe

<sup>2</sup>Department of Chemical Sciences, Faculty of Science, University of Johannesburg, Kingsway Campus: C2 Lab 328, Auckland Park, 2006, South Africa

E-mail: [mehlanag@staff.msu.ac.zw](mailto:mehlanag@staff.msu.ac.zw)

**Table S1:** Iridium supported on different materials for CO<sub>2</sub> hydrogenation.

|                                                                                               | <b>Product</b> | <b>Activity (TON)</b> | <b>Reference</b> |
|-----------------------------------------------------------------------------------------------|----------------|-----------------------|------------------|
| Ir supported on mesoporous silica                                                             | formate        | -                     | 1                |
| Ir supported on zeolite imidazolate framework                                                 | formate        | 30000                 | 2                |
| Ir on UiO-66 MOF                                                                              | formate        | 6149                  | 3                |
| 1,5-cyclooctadiene-iridium(I) chloride supported on polymerized cyclic (alkyl)(amino)carbenes | formate        | 195,600               | 4                |
| Ir supported on Covalent Triazine Framework                                                   | formate        | 5000                  | 5                |
| Iridium supported on spinal cubic cobalt oxide                                                | formate        | 3809                  | 6                |
| Ir supported on Covalent Triazine Framework                                                   | formate        | -                     | 7                |
| Ir supported on Covalent organic Framework                                                    | formate        | 6400                  | 8                |
| Ir supported on mesoporous silica                                                             | formate        | 14200                 | 9                |

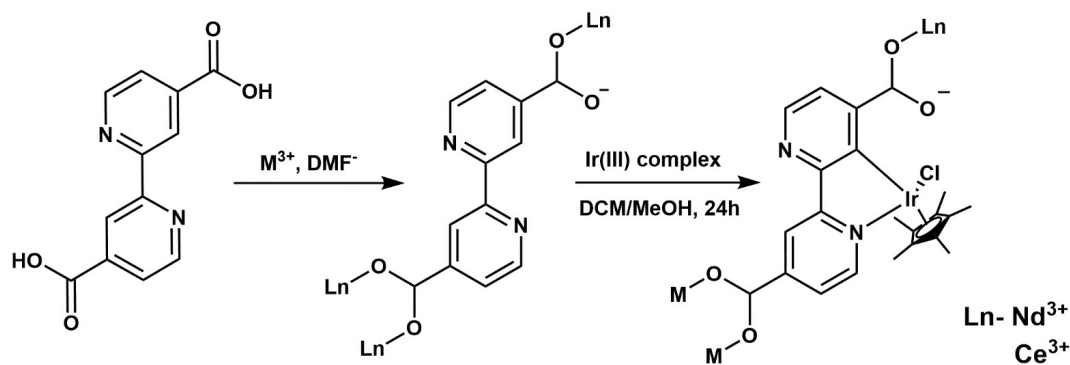

**Scheme S1:** Synthesis and functionalization scheme of JMS-6a and JMS-7a. Due to steric hinderance some sites will remain unfunctionalized. This is in line with the observed catalyst load as determined by ICP-OES

**Table S2:** JMS-6 and JMS-7 crystallographic information.

|                                              | JMS-6                                                                          | JMS-7                                                                          |
|----------------------------------------------|--------------------------------------------------------------------------------|--------------------------------------------------------------------------------|
| <b>Empirical formula</b>                     | C <sub>24</sub> H <sub>26</sub> N <sub>5</sub> Nd <sub>1</sub> O <sub>10</sub> | C <sub>24</sub> H <sub>26</sub> N <sub>5</sub> Ce <sub>1</sub> O <sub>10</sub> |
| <b>Formula weight (g mol<sup>-1</sup>)</b>   | 684.41                                                                         | 687.64                                                                         |
| <b>Temperature/K</b>                         | 100(2)                                                                         | 100(2)                                                                         |
| <b>Crystal system</b>                        | Triclinic                                                                      | Triclinic                                                                      |
| <b>Space group</b>                           | <i>P</i> -1                                                                    | P-1                                                                            |
| <b>a/Å</b>                                   | 10.0085(4)                                                                     | 10.0554(4)                                                                     |
| <b>b/Å</b>                                   | 11.2398(4)                                                                     | 11.1554(4)                                                                     |
| <b>c/Å</b>                                   | 13.5602(6)                                                                     | 13.6202(5)                                                                     |
| <b>α/°</b>                                   | 68.4370(12)                                                                    | 68.7124(12)                                                                    |
| <b>β/°</b>                                   | 86.0626(14)                                                                    | 86.0229(14)                                                                    |
| <b>γ/°</b>                                   | 74.5010(13)                                                                    | 74.3419(12)                                                                    |
| <b>Volume/Å<sup>3</sup></b>                  | 1366.33(15)                                                                    | 1370.04 (14)                                                                   |
| <b>Z</b>                                     | 2                                                                              | 2                                                                              |
| <b>Calculated density (g/cm<sup>3</sup>)</b> | 1.6763                                                                         | 1.6667                                                                         |
| <b>μ(Mo-Kα) /mm<sup>-1</sup></b>             | 1.627                                                                          | 1.725                                                                          |
| <b>F(000)</b>                                | 686                                                                            | 692                                                                            |
| <b>Crystal size/mm<sup>3</sup></b>           | 0.050 x 0.120 x 0.140                                                          | 0.020 x 0.040x 0.090                                                           |
| <b>Radiation</b>                             | 0.71073Å                                                                       | 0.71073Å                                                                       |
| <b>2θ range for data collection/°</b>        | 55.11°                                                                         | 56.57°                                                                         |
| <b>Index ranges</b>                          | 13,15,18                                                                       | 13,15,18                                                                       |
| <b>Reflections collected</b>                 | 6808                                                                           | 6850                                                                           |

|                                         |             |          |
|-----------------------------------------|-------------|----------|
| No. unique data                         | 6452        | 6167     |
| Goodness of fit on S                    | 1.14        | 1.056    |
| Final R indexes [ $I \geq 2\sigma(I)$ ] | 0.0265      | 0.0279   |
| Final $wR_2$ indexes [all data]         | 0.0685      | 0.0581   |
| Deepest hole/Highest peak               | -0.99, 1.14 | -0.96, 1 |

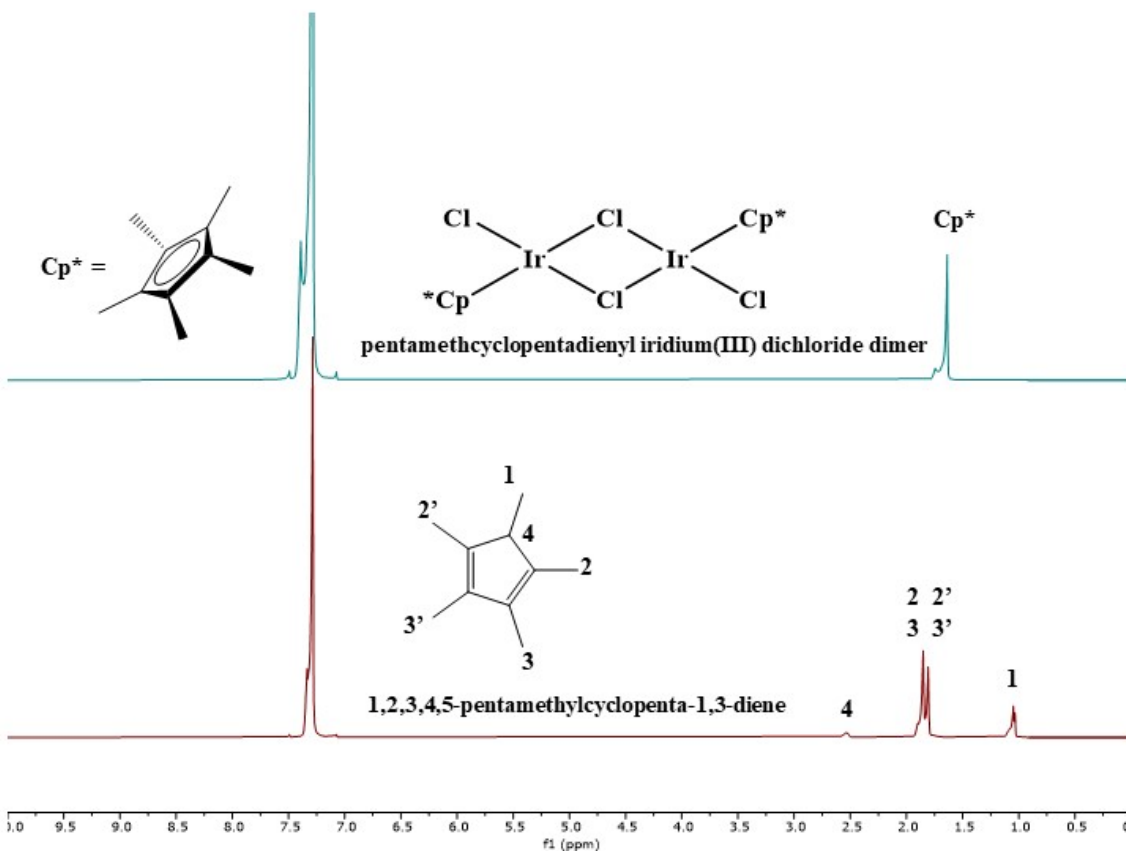

**Fig S1:**  $^1\text{H}$  NMR (Bottom) Stacked NMR of precursor (1,2,3,4,5-pentamethylcyclopenta-1,3-diene) and (top) pentamethylcyclopentadienyl iridium(III) dichloride dimer.

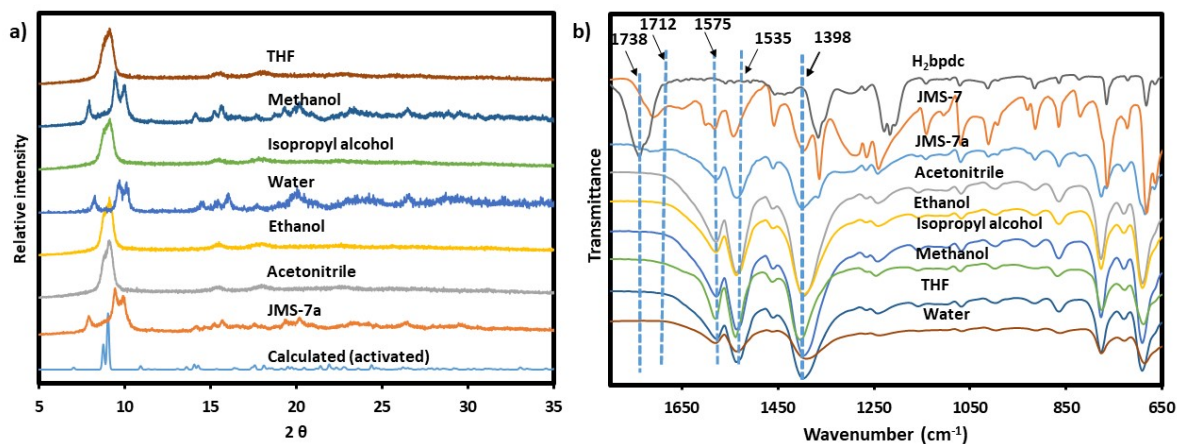

**Fig S2: Solvent stability of JMS-7a, (a) PXRD (b) FTIR.**

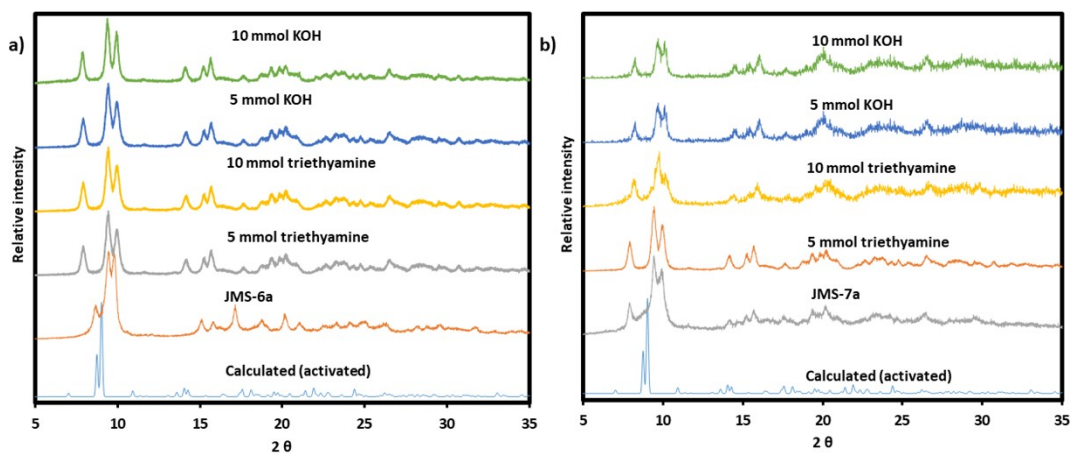

**Fig S3: PXRD of base stability of JMS-6a and JMS-7a.**

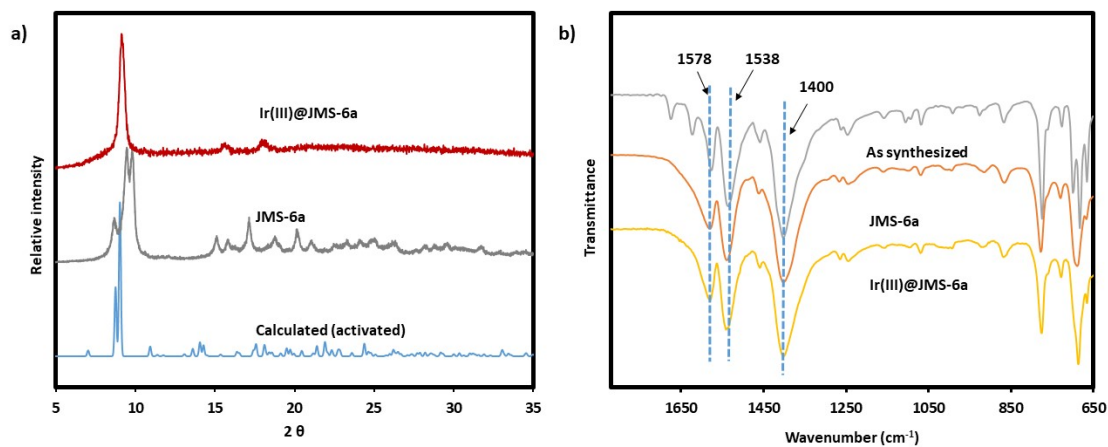

**Fig S4: Functionalization of JMS-6a, (a) PXRD and (b) FTIR.**

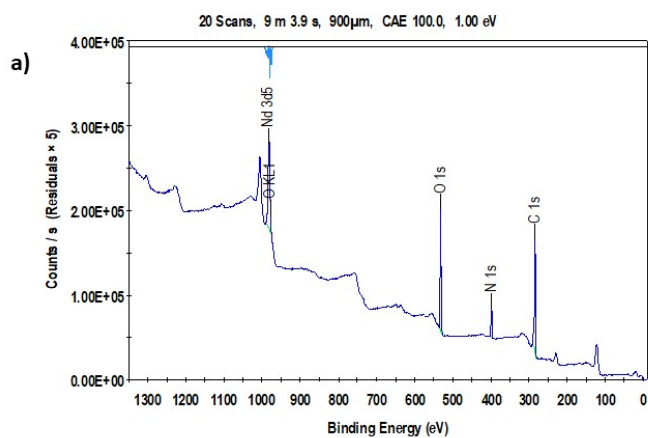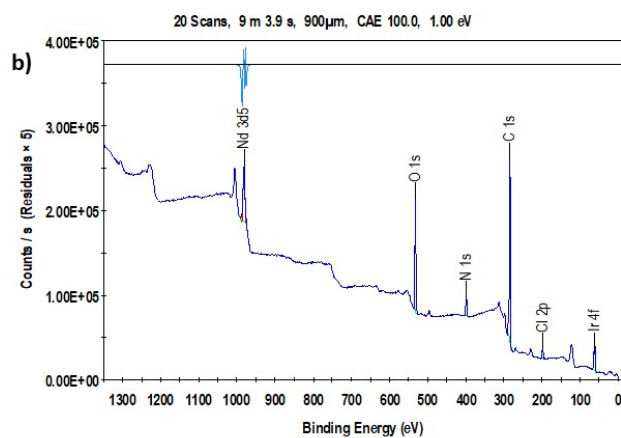

**Fig S5:** XPS spectra of JMS-6a and Ir(III)@JMS-6a.

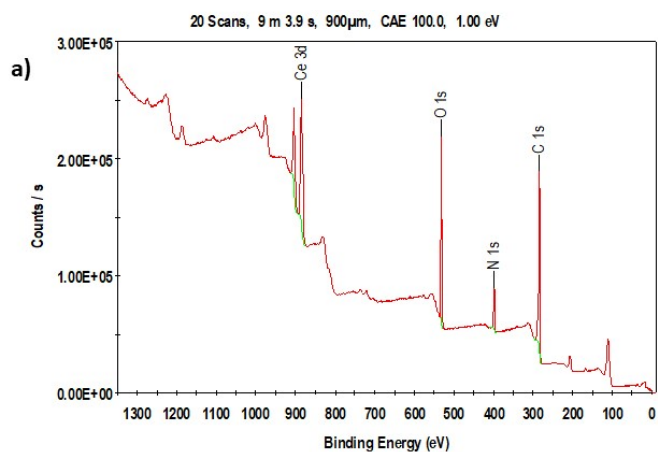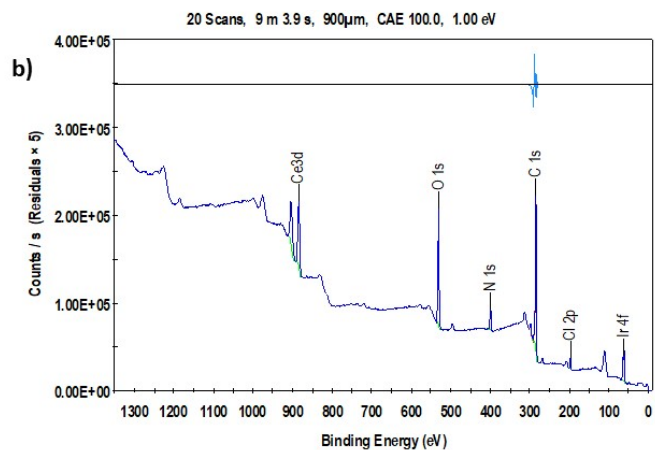

**Fig S6:** XPS spectra of JMS-7a and Ir(III)@JMS-7a.

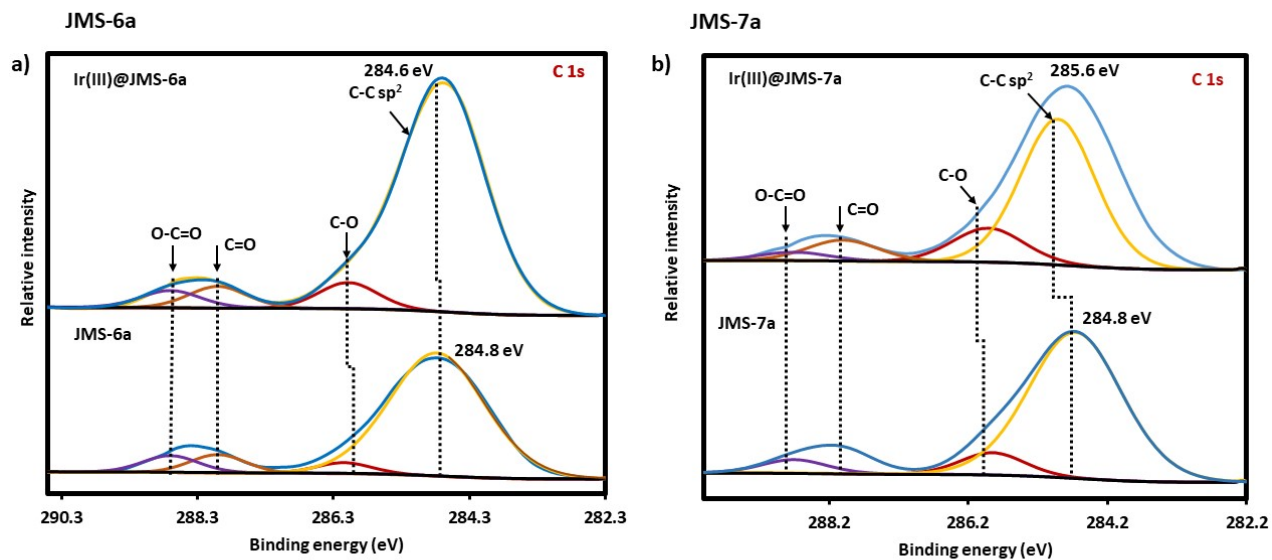

**Fig S7:** C 1s XPS analysis of Ir(III)@JMS-6a and Ir(III)@JMS-7a.

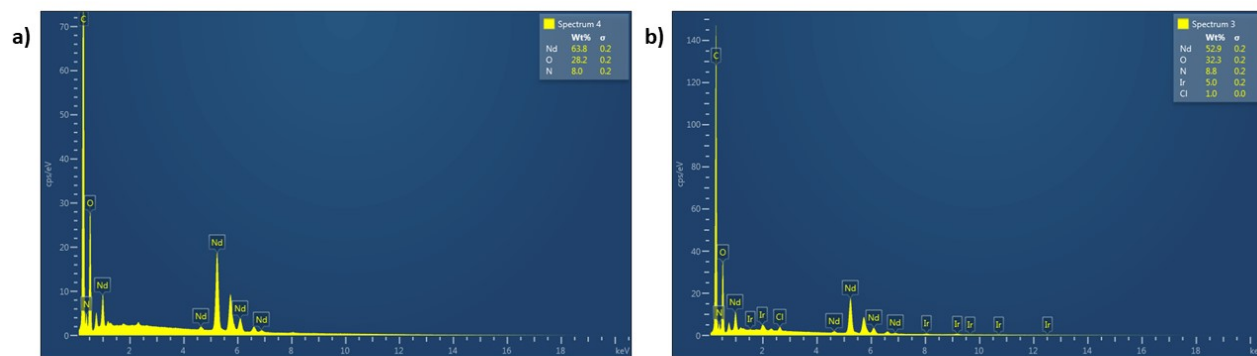

**Fig S8:** EDX spectra of JMS-6a and Ir(III)@JMS-6a.

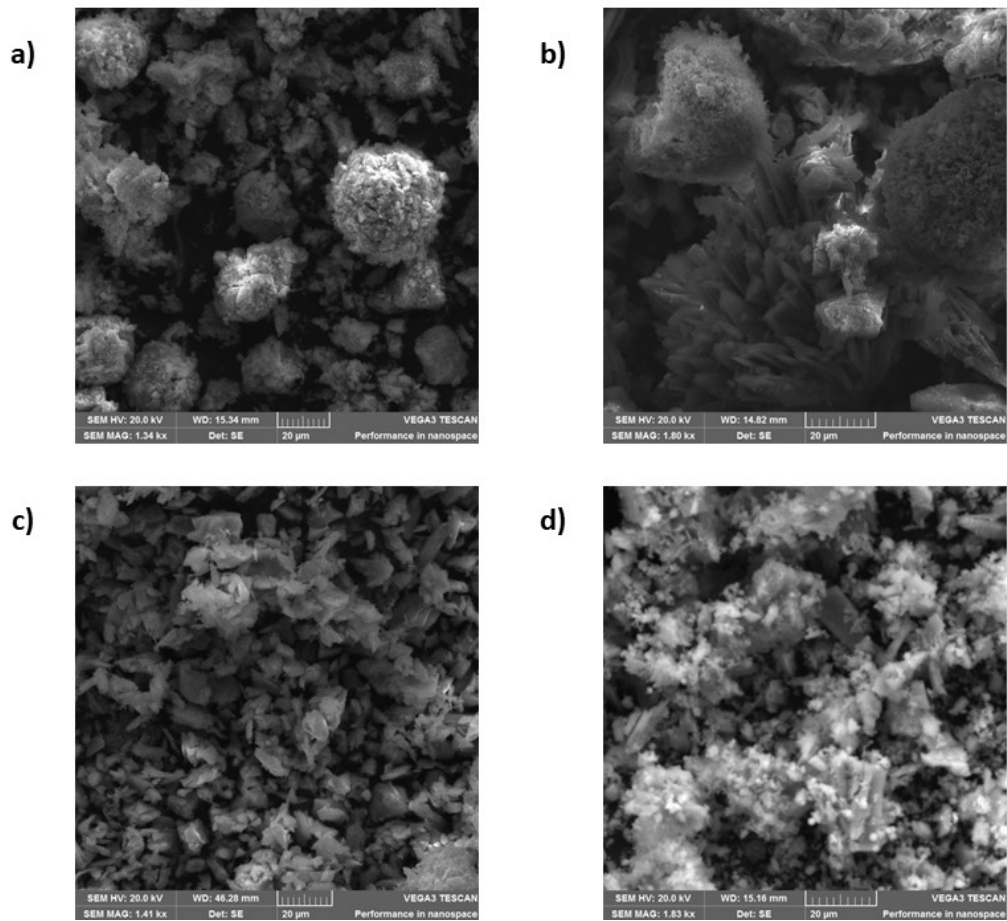

**Fig S9:** SEM images of, (a) JMS-6a, (b) JMS-7a, (c) Ir(III)@JMS-6a, (d) Ir(III)@JMS-7a.

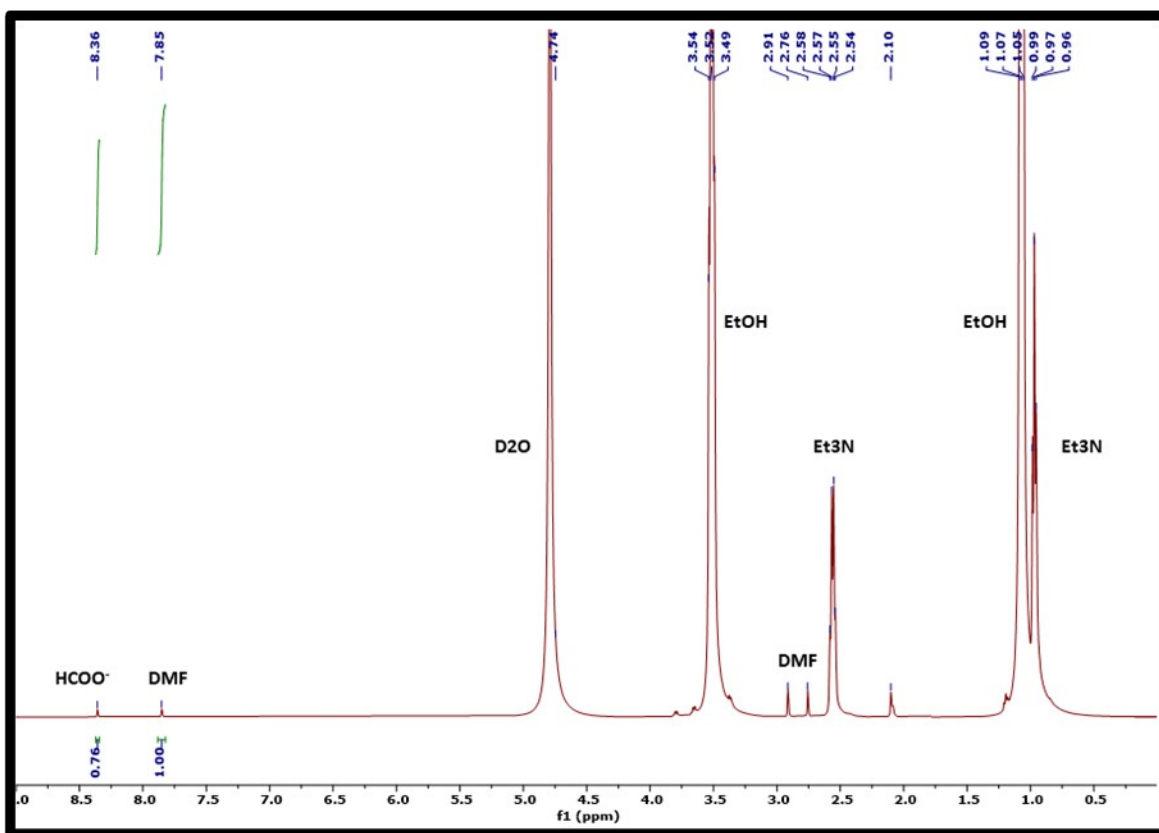

**Fig S10:**  $^1\text{H}$  NMR post catalysis (Ir(III)@JMS-7a, used to detect and quantify formate).

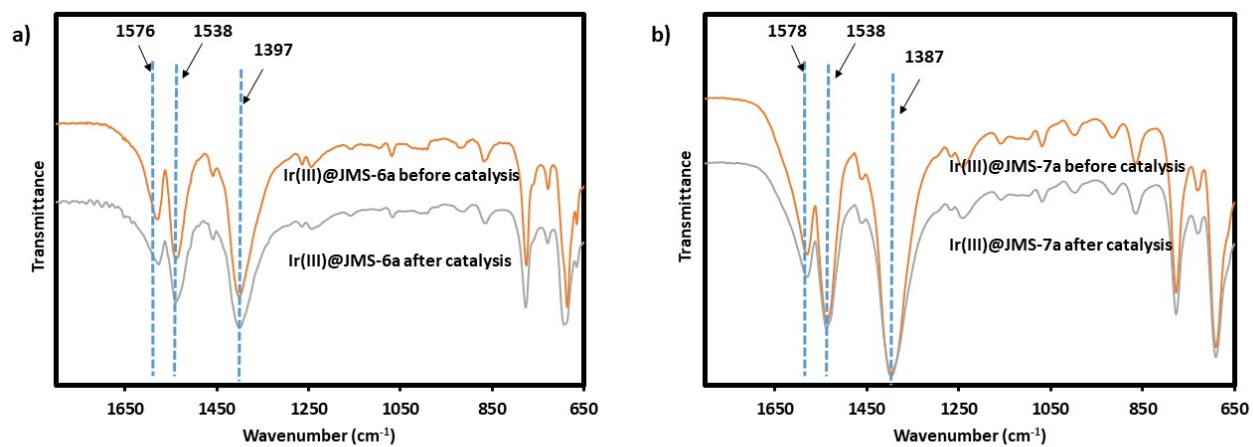

**Fig S11:** FTIR analysis of Ir(III)@JMS-6a and Ir(III)@JMS-7a before and after catalysis.



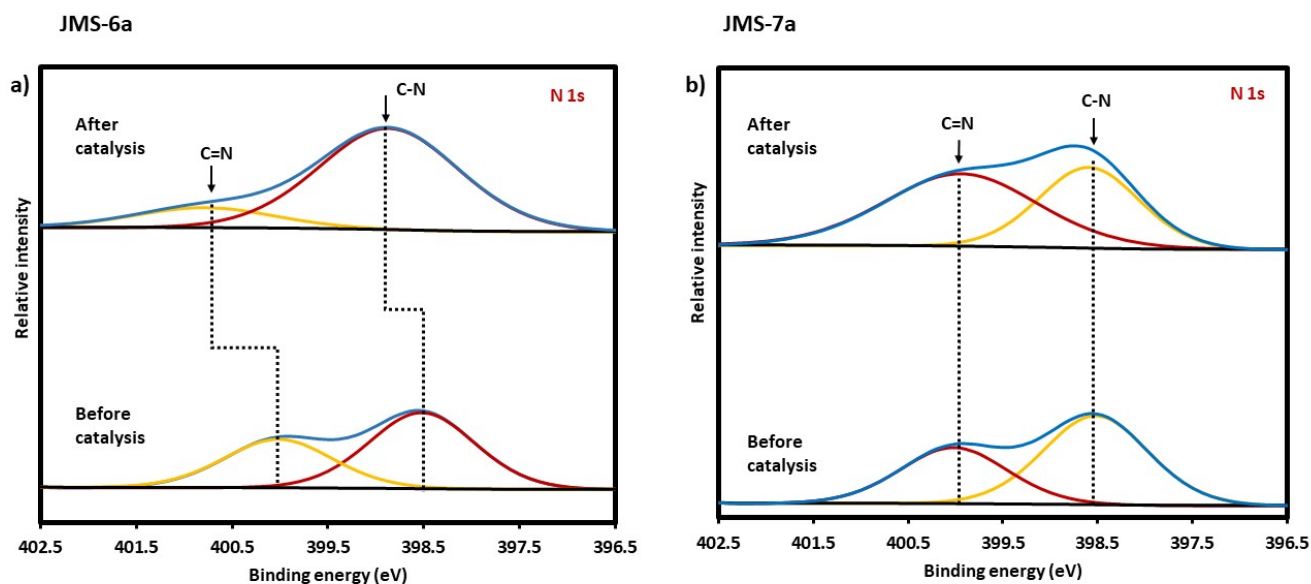

**Fig S12:** N 1s XPS analysis of Ir(III)@JMS-6a and Ir(III)@JMS-7a before and after catalysis.

## References

- 1 S. Yamaguchi and S. Hashimoto, *Asian J. Org. Chem.*, 2020, **9**, 99–104.
- 2 K. R. Oh, G. N. Yun, K. D. Kim, Y. J. Cheong, C. Yoo, F. Prihatno, H. Y. Jang, A. H. Valekar, G. Y. Cha, M. Lee, J. Jung, Y. U. Kwon and Y. K. Hwang, *Chem. Mater.*, 2022, **34**, 8153–8162.
- 3 B. An, L. Zeng, M. Jia, Z. Li, Z. Lin, Y. Song, Y. Zhou, J. Cheng, C. Wang and W. Lin, *J. Am. Chem. Soc.*, 2017, **139**, 17747–17750.
- 4 L. Zhou, C. Yao, W. Ma, J. Hu, Y. Wu, Z. Zhang and X. Hu, *J. CO<sub>2</sub> Util.*, 2021, **54**, 101769.
- 5 K. Park, G. H. Gunasekar, N. Prakash, K. D. Jung and S. Yoon, *ChemSusChem*, 2015, **8**, 3410–3413.
- 6 B. D. Bankar, K. Ravi, R. J. Tayade and A. V Biradar, *J. CO<sub>2</sub> Util.*, 2023, **67**, 102315.
- 7 J. J. Corral-Pérez, A. Billings, D. Stoian and A. Urakawa, *ChemCatChem*, 2019, **11**, 4725–4730.
- 8 G. Gunniya Hariyanandam, D. Hyun, P. Natarajan, K. D. Jung and S. Yoon, *Catal. Today*, 2016, **265**, 52–55.
- 9 H. K. Lo, I. Thiel and C. Copéret, *Chem. - A Eur. J.*, 2019, **25**, 9443–9446.
